# Supplementary material for: Processive cleavage of substrate at individual proteolytic active sites of the Lon protease complex
Source: PubMed Central journal article supplement — Sci Adv. 2021 Nov 10;7(46):eabj9537. doi: 10.1126/sciadv.abj9537 (PMC8580320; doi:10.1126/sciadv.abj9537), 2021-11-10
Supplement: sciadv.abj9537_sm.pdf [file sciadv.abj9537_sm.pdf]

Supplementary Materials for  
**Processive cleavage of substrate at individual proteolytic active sites of the  
Lon protease complex**

Shanshan Li, Kan-Yen Hsieh, Chiao-I Kuo, Shih-Chieh Su, Kai-Fa Huang,  
Kaiming Zhang\*, Chung-I Chang\*

\*Corresponding author. Email: kmzhang@ustc.edu.cn (K.Z.); chungi@gate.sinica.edu.tw (C.-I.C)

Published 10 November 2021, *Sci. Adv.* 7, eabj9537 (2021)  
DOI: 10.1126/sciadv.abj9537

**This PDF file includes:**

Figs. S1 to S6  
Tables S1 to S2

Supplementary figure legends and tables

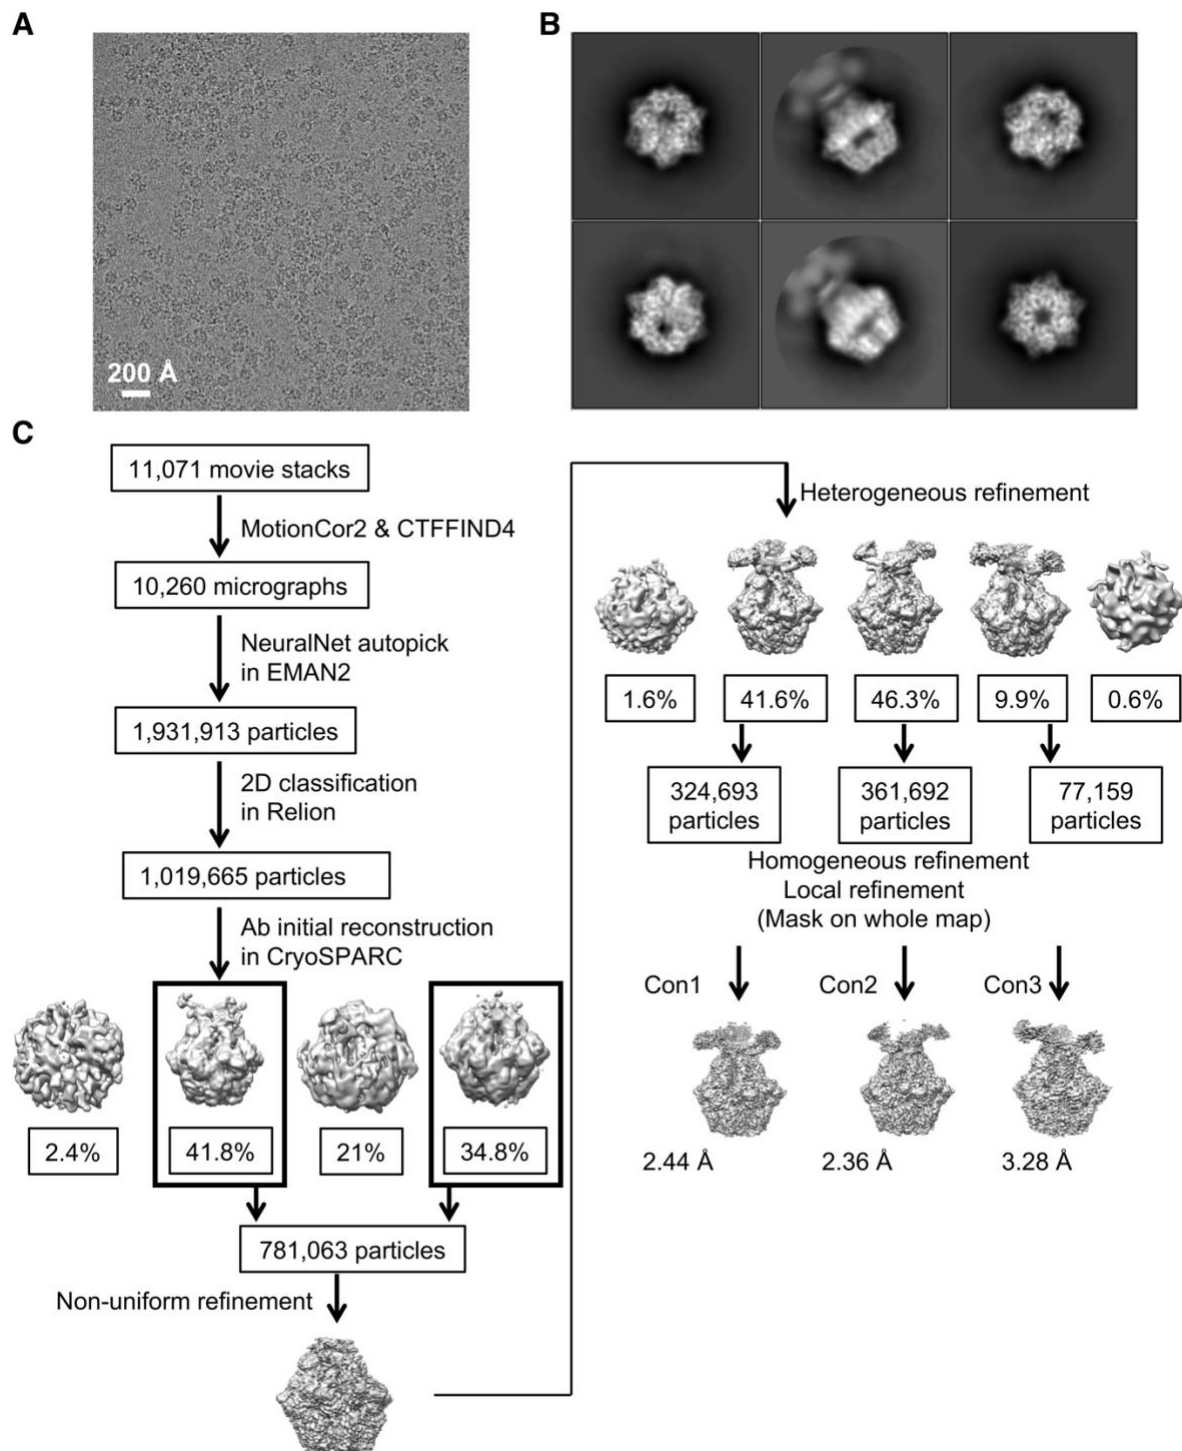

**Fig. S1. Single-particle cryo-EM analysis of MtaLonA.** (A) Representative motion-corrected cryo-EM micrograph. (B) Reference-free 2D class averages. (C) Workflow of the data processing.

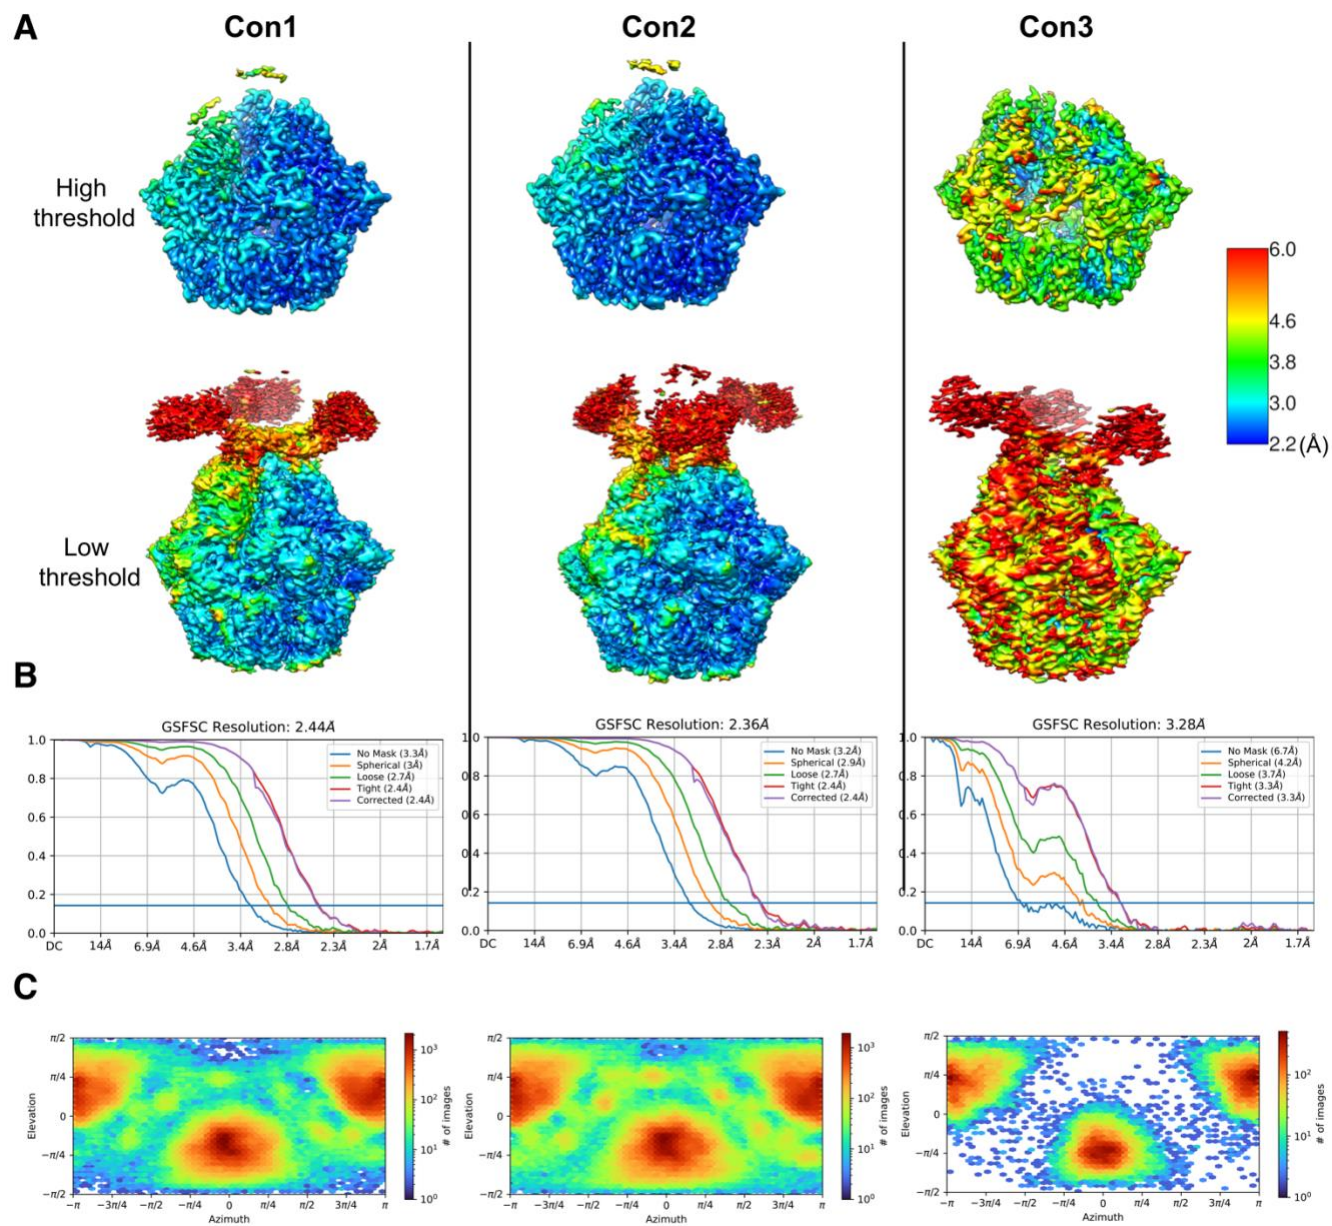

**Fig. S2. Evaluation of the final 3D reconstructions of MtaLonA.** (A) Resolution maps for the final 3D reconstructions in two threshold levels of Con1 (left), Con2 (middle), and Con3 (right). (B) Gold standard FSC plots for the 3D reconstructions of Con1 (left), Con2 (middle), and Con3 (right), calculated in cryoSPARC. (C) Euler angle distribution of the particle images.

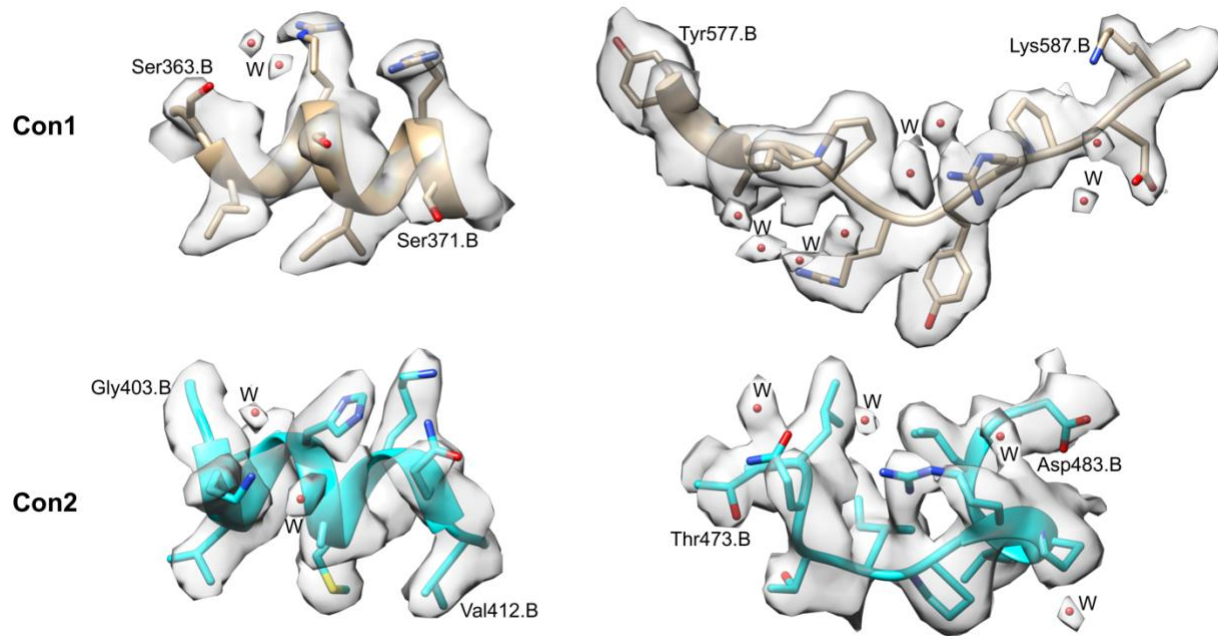

**Fig. S3. Selected regions of the high-resolution maps showing well-defined densities for water molecules.** The models are shown in ribbons and sticks, with water molecules (W) indicated. Selected side chains are labelled by residue name and number, followed by the chain ID.

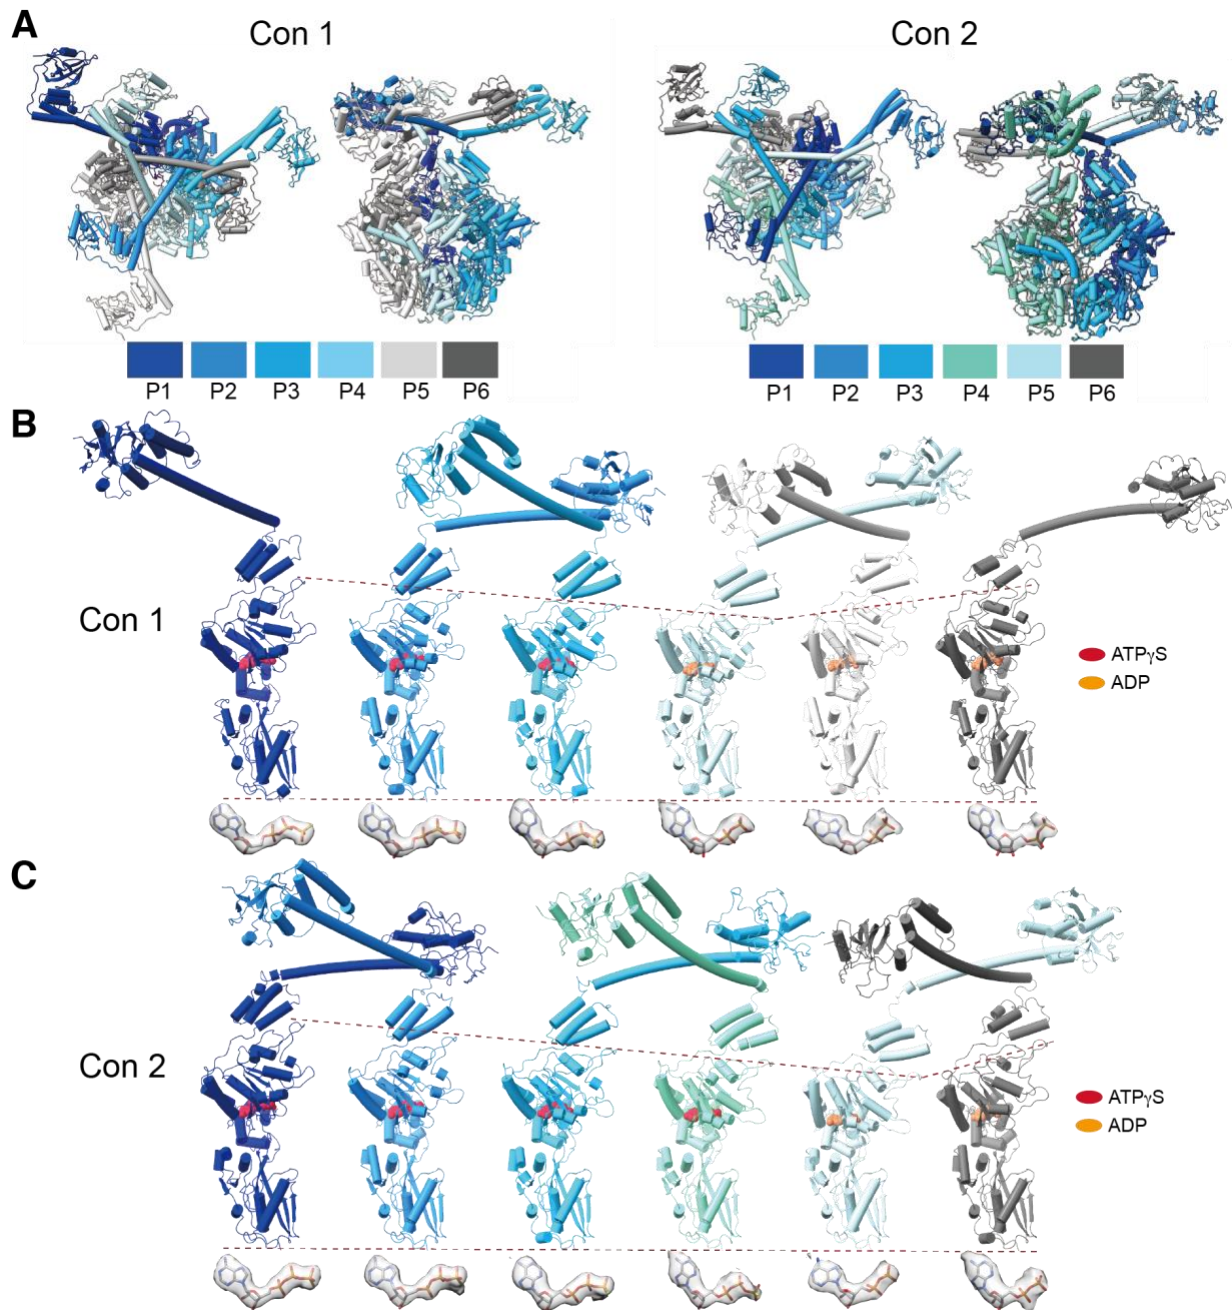

**Fig. S4. Conformational states of MtaLonA bound to endogenous substrates.** (A) Overall structures of Con1 and Con2 shown in ribbon models with cylindrical helices. (B and C) Aligned protomers of Con1 (B) and Con2 (C) showing different helical arrangements in the six conformational states (P1-6), of which the P5-P6 protomers in Con1 and the P6 protomer in Con2

serve as the seam subunits in the hexameric ring. The nucleotide densities with fitted models are shown below each of the protomers.

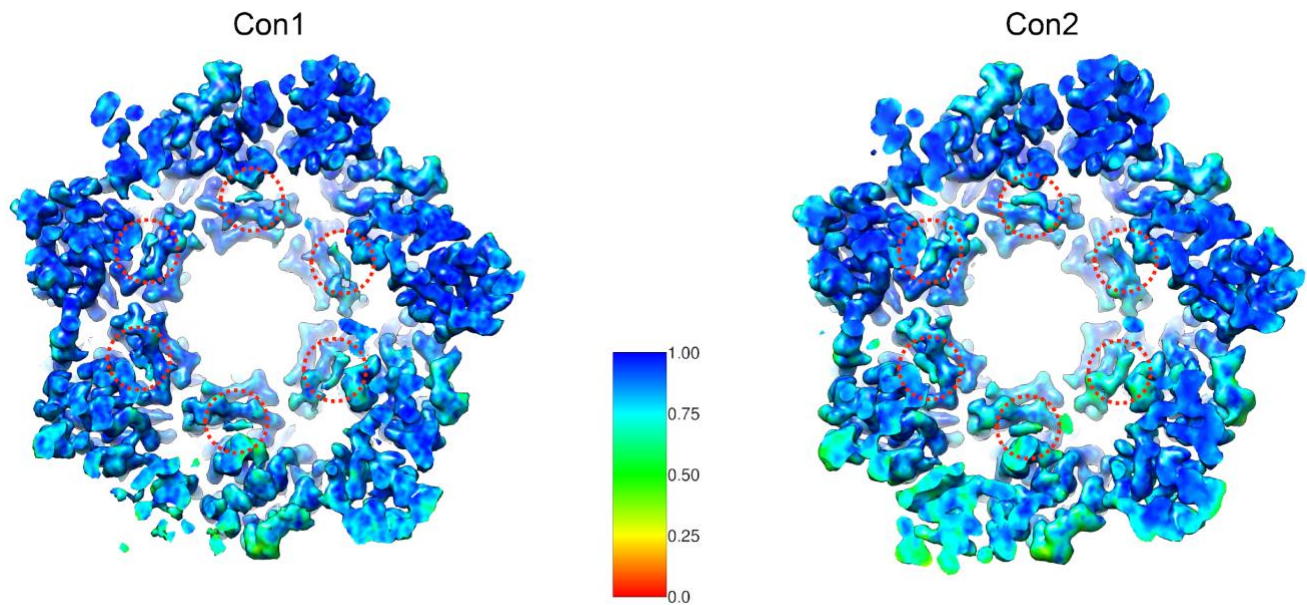

**Fig. S5. Cryo-EM occupancy maps of Con1 and Con2.** The cross-sectioned maps showing the substrate densities (red dashed circles) in the protease ring are colored according to the occupancy maps obtained by LocOccupancy (22). The occupancy ranges from 0 (red) to 1 (blue), indicating no density and full occupancy, respectively.

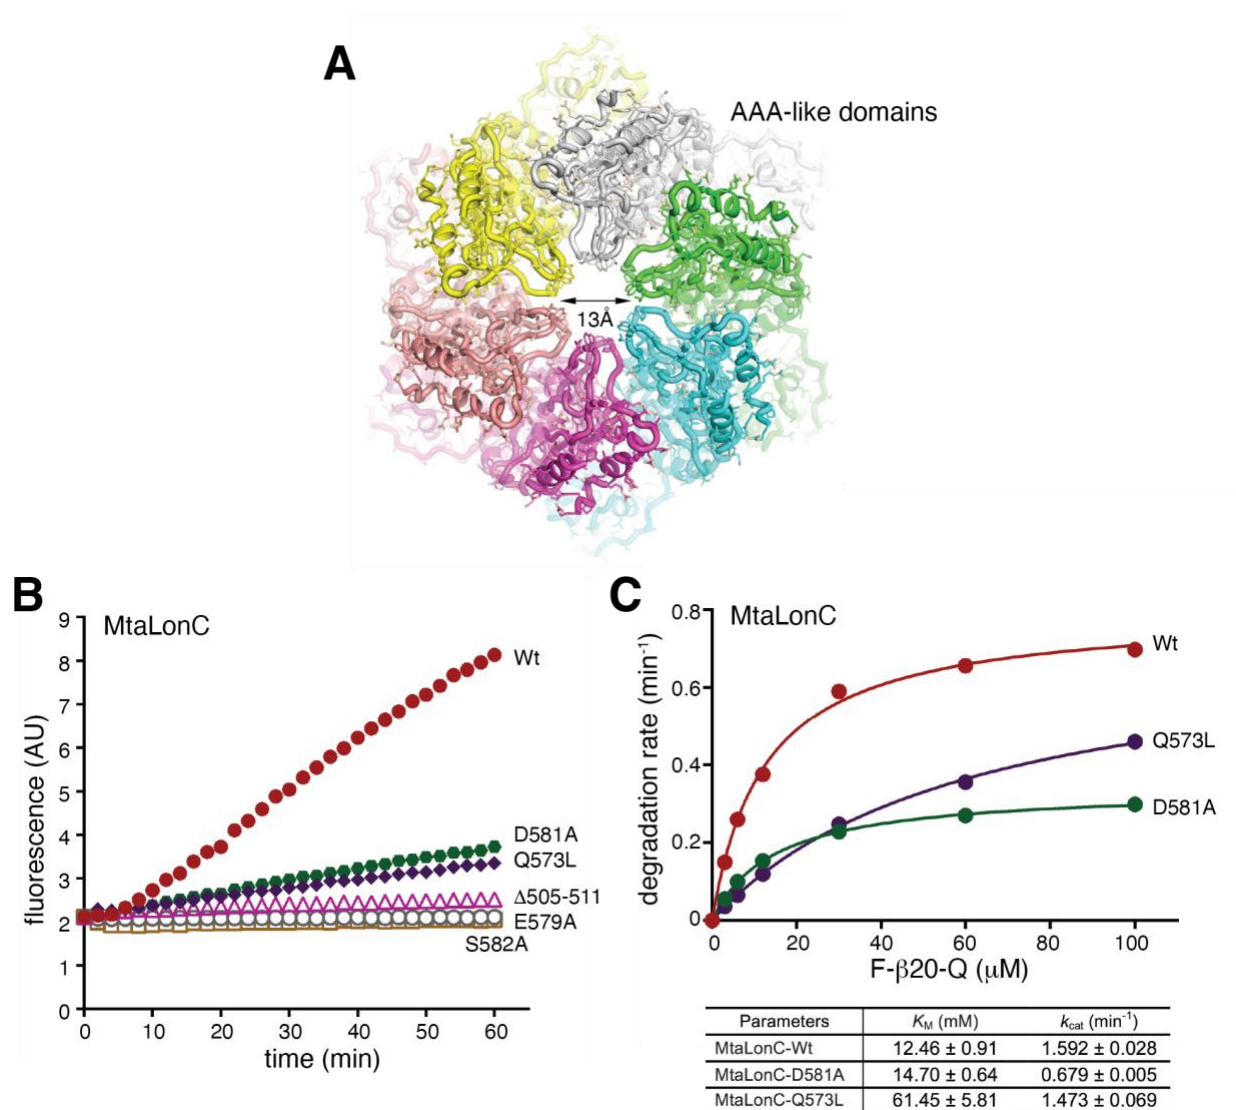

**Fig. S6. Structural and activity features of ATP-independent Lon-like protease MtaLonC.** (A) Structure of MtaLonC showing the hexameric ring of AAA-like domains, which form an open pore for substrate access independently of ATP. (B) Peptidase activity of wild type (Wt) and mutants of MtaLonC. Cleavage of the intramolecularly quenched fluorogenic peptide F- $\beta$ 20-Q was monitored by real-time fluorescence detection. (C) Enzyme kinetic analysis of wild-type (Wt) MtaLonC and the mutants. Q573L and E579A are control mutants designed to alter the substrate-binding groove. The reactions were carried out by incubation at 55°C for 30 min and then stopped prior to fluorescence measurement.



**Table S1. Cryo-EM data collection, processing, and model validation**

|                                         | MtaLonA                                    |             |             |
|-----------------------------------------|--------------------------------------------|-------------|-------------|
| <b>Data collection and processing</b>   |                                            |             |             |
| Microscope                              | Titan Krios G3i                            |             |             |
| Voltage (kV)                            | 300                                        |             |             |
| Camera                                  | Thermo Fisher Falcon 4                     |             |             |
| Grids Type                              | R1.2/1.3 Quantifoil copper grid (200 mesh) |             |             |
| Sample concentration                    | 0.5 mg/mL                                  |             |             |
| Magnification                           | 96,000×                                    |             |             |
| C2 aperture size (μm)                   | 50                                         |             |             |
| Objective aperture size (μm)            | 100                                        |             |             |
| Pixel size (Å)                          | 0.82                                       |             |             |
| Total exposure (e-/Å <sup>2</sup> )     | 48                                         |             |             |
| Exposure time (s)                       | 5.8                                        |             |             |
| Number of frames per exposure           | 40                                         |             |             |
| Energy filter slit width (eV)           | N/A                                        |             |             |
| Data collection software                | EPU 2.7                                    |             |             |
| Maximum image shift (μm)                | 6                                          |             |             |
| Number of exposures per hole            | 6                                          |             |             |
| Defocus range (μm)                      | -0.6 to -2.1                               |             |             |
| Number of micrographs collected         | 11,071                                     |             |             |
| Number of micrographs used              | 10,260                                     |             |             |
| Number of initial particles             | 1,931,913                                  |             |             |
| Conformations                           | <b>Con1</b>                                | <b>Con2</b> | <b>Con3</b> |
| Symmetry                                | C1                                         | C1          | C1          |
| Number of final particles               | 324,693                                    | 361,692     | 77,159      |
| Resolution (0.143 gold standard FSC, Å) | 2.44                                       | 2.36        | 3.28        |
| Local resolution range (Å)              | 2-6                                        | 2-6         | 3-8         |
| <b>Atomic model refinement</b>          |                                            |             |             |
| Software                                | phenix                                     | phenix      | phenix      |
| Clashscore, all atoms                   | 3.93                                       | 4.08        | 6.68        |
| Poor rotamers (%)                       | 0.36                                       | 0.89        | 0.31        |
| Favored rotamers (%)                    | 95.42                                      | 94.91       | 96.46       |
| Ramachandran outliers (%)               | 0.17                                       | 0.15        | 0.26        |
| Ramachandran favored (%)                | 94.15                                      | 95.69       | 92.82       |
| MolProbity score                        | 1.57                                       | 1.49        | 1.82        |
| Bad bonds (%)                           | 0.01                                       | 0.07        | 0.08        |
| Bad angles (%)                          | 0.08                                       | 0.07        | 0.12        |
| PDB code                                | 7FID                                       | 7FIE        | 7FIZ        |

**Table S2. Crystallographic data collection and refinement statistics**

| <b>Data collection</b>                                      |                                       |                                   |                                        |                                   |
|-------------------------------------------------------------|---------------------------------------|-----------------------------------|----------------------------------------|-----------------------------------|
| Crystal (space group <i>P6</i> )                            | <b>S582A/F-<math>\beta</math>20-Q</b> | <b>S582A/<math>\beta</math>19</b> | <b>D581A/ F-<math>\beta</math>20-Q</b> | <b>D581A/<math>\beta</math>19</b> |
| Resolution range ( $\text{\AA}$ )                           | 30.0-2.12<br>(2.20-2.12) <sup>†</sup> | 50.0-2.20<br>(2.28-2.20)          | 20.0-2.10<br>(2.17-2.10)               | 20.0-2.25<br>(2.33-2.25)          |
| Cell dimensions ( $\text{\AA}$ ), <i>a = b, c</i>           | 115.6, 135.5                          | 115.8, 135.5                      | 115.8, 136.3                           | 115.7, 136.0                      |
| Total observations                                          | 665,808                               | 394,543                           | 375,487                                | 254,263                           |
| Unique reflections                                          | 58,112 (5,772)                        | 52,084 (5,127)                    | 57,412 (5,444)                         | 48,531 (4,799)                    |
| Redundancy                                                  | 11.5 (11.4)                           | 7.6 (7.4)                         | 6.5 (5.7)                              | 5.2 (4.7)                         |
| Completeness (%)                                            | 99.9 (100.0)                          | 99.7 (98.7)                       | 95.3 (90.9)                            | 99.2 (98.2)                       |
| <i>I</i> / $\sigma$ ( <i>I</i> )                            | 21.5 (3.9)                            | 26.6 (3.3)                        | 29.8 (2.3)                             | 23.7 (2.1)                        |
| <i>R</i> <sub>merge</sub> (%)                               | 11.3 (69.8)                           | 8.6 (65.5)                        | 5.7 (89.1)                             | 6.3 (59.2)                        |
| <b>Refinement</b>                                           |                                       |                                   |                                        |                                   |
| Resolution ( $\text{\AA}$ )                                 | 29.95-2.12                            | 30.46-2.20                        | 19.85-2.10                             | 19.83-2.25                        |
| Reflections [ $> 0 \sigma(F)$ ], working/test               | 52,163/2,934                          | 46,727/2,655                      | 46,326/2,600                           | 38,857/2,255                      |
| <i>R</i> factor/ <i>R</i> <sub>free</sub>                   | 0.184/0.218                           | 0.182/0.211                       | 0.154/0.178                            | 0.153/0.193                       |
| R.m.s.d. bond lengths ( $\text{\AA}$ )/ angles ( $^\circ$ ) | 0.013/1.6                             | 0.014/1.7                         | 0.010/1.4                              | 0.010/1.5                         |
| Average <i>B</i> factor ( $\text{\AA}^2$ )/no. of atoms     |                                       |                                   |                                        |                                   |
| Protein                                                     | 42.2/4,553                            | 44.8/4,510                        | 32.8/4,566                             | 36.9/4,509                        |
| Substrate                                                   | 34.2/33                               | 38.9/34                           | 30.8/42                                | 29.0/34                           |
| Phosphate ion                                               | 32.5/5                                | 33.2/5                            | 24.5/5                                 | 29.5/5                            |
| Water                                                       | 48.0/372                              | 48.1/280                          | 39.4/427                               | 39.9/257                          |
| Ramachandran plot (%)                                       |                                       |                                   |                                        |                                   |
| Most favored                                                | 92.5                                  | 91.2                              | 92.6                                   | 91.9                              |
| Additionally allowed                                        | 7.1                                   | 8.6                               | 7.2                                    | 7.9                               |
| Generously allowed                                          | 0.4                                   | 0.2                               | 0.2                                    | 0.2                               |
| Disallowed                                                  | 0                                     | 0                                 | 0                                      | 0                                 |
| PDB code                                                    | 7EV4                                  | 7EUY                              | 7EV6                                   | 7EUX                              |

<sup>†</sup>Values in parentheses correspond to the highest resolution shell.
